# Supplementary material for: The Evolutionary Dynamics of the Mitochondrial tRNA in the Cichlid Fish Family
Source: Biology (Basel). 2022 Oct 18;11(10):1522. doi: 10.3390/biology11101522 (PMC9598224; doi:10.3390/biology11101522)
Supplement: Supplementary file 1 [file biology-11-01522-s001.zip › Supplementary Tables.xlsx]

## Sheet: Cichlid mitogenomes
Supplementary Table S1. The 95 mitogenomes of cichlid species, names, the accession number, percentage of GC content, size of mitogenomes and published (Pub) or unpublished (Un) or cited (Ct). The highlighted mitogenomes discards from the analysis.
No.	Name	Accession	%GC	Size	P / C
1	Aequidens metae	NC_033544.1	0.464	16541	Un
2	Alticorpus geoffreyi	NC_028033.1	0.458	16578	Ct
3	Amphilophus citrinellus	NC_023827.1	0.458	16522	Ct
4	Andinoacara pulcher	NC_033547	0.431	16513	Un
5	Andinoacara rivulatus	NC_025671	0.431	16585	Ct
6	Astatotilapia calliptera	NC_018560.1	0.459	16578	Un
7	Astronotus ocellatus	NC_009058.1	0.45	16569	Pub
8	Aulonocara stuartgranti	NC_029380.1	0.458	16699	Pub
9	Buccochromis nototaenia	NC_031416.1	0.459	16,58	Un
10	Bujurquina mariae	NC_033543	0.411	16,54	Un
11	Chaetobranchopsis bitaeniatus	NC_033542	0.415	16,61	Un
12	Cheilochromis euchilus	NC_020672.1	0.459	16582	Pub
13	Chilotilapia rhoadesii	NC_035992.1	0.46	16,58	Un
14	Cichla ocellaris	NC_030272.1	0.456	16526	Ct
15	Cichlasoma dimerus	NC_033551.1	0.455	16617	Un
16	Copadichromis mloto	NC_030584	0.459	16538	Un
17	Copadichromis quadrimaculatus	NC_030607.1	0.46	16583	Un
18	Copadichromis trimaculatus	NC_035991.1	0.46	16581	Un
19	Copadichromis virginalis	NC_029761	0.457	16704	Ct
20	Coptodon zillii	MW194077	0.472	16551	Un
21	Coptodon zillii	NC_026110.1	0.47	16619	Pub
22	Cryptoheros cutteri	NC_033552.1	0.47	16528	Un
23	Cyathochromis obliquidens	NC_035993.1	0.459	16581	Un
24	Cynotilapia afra	NC_018564.1	0.458	16585	Pub
25	Dimidiochromis compressiceps	NC_018561.1	0.46	16583	Pub
26	Dimidiochromis kiwinge	NC_030608.1	0.46	16581	Un
27	Diplotaxodon limnothriss	NC_018556.1	0.459	16579	Pub
28	Etroplus maculatus	NC_011179.1	0.463	16457	Pub
29	Etroplus suratensis	NC_029832.1	0.461	16467	Un
30	Fossorochromis rostratus	NC_028089.1	0.46	16581	Pub
31	Genyochromis mento	NC_018562.1	0.458	16583	Pub
32	Geophagus brasiliensis	NC_031181.1	0.458	16559	Pub
33	Geophagus steindachneri	NC_033545.1	0.461	16594	Un
34	Haplochromis burtoni	NC_027289.1	0.455	16583	Pub
35	Hemitilapia oxyrhyncha	NC_031415.1	0.46	16583	Un
36	Herichthys cyanoguttatus	NC_033546.1	0.465	16,54	Un
37	Heterotilapia buttikoferi	NC_023470.1	0.47	16577	Pub
38	Hypselecara temporalis	NC_011168.1	0.461	16544	Pub
39	Konia dikume	NC_041676	0.463	16618	Pub
40	Krobia guianensis	NC_031440.1	0.457	16539	Un
41	Lethrinops lethrinus	NC_031419.1	0.46	16582	Un
42	Maylandia zebra	NC_027944.1	0.459	16582	Un
43	Mikrogeophagus ramirezi	NC_031439.1	0.446	16526	Un
44	Myaka myaka	NC_041675	0.466	16626	Ct
45	Mylochromis lateristriga	NC_029740.1	0.459	16576	Pub
46	Nannacara anomala	NC_031183	0.466	16502	Pub
47	Neolamprologus brichardi	NC_009062.1	0.46	16587	Pub
48	Nimbochromis linni	NC_018558.1	0.46	16584	Pub
49	Oreochromis andersonii	NC_037019.1	0.457	16642	Un
50	Oreochromis aureus	NC_013750.1	0.466	16628	Pub
51	Oreochromis esculentus	NC_025555.1	0.464	16622	Ct
52	Oreochromis macrochir	NC_037020.1	0.457	16644	Un
53	Oreochromis mossambicus	NC_007231.1	0.456	16641	Ct
54	Oreochromis niloticus	NC_013663	0.458	16627	Ct
55	Oreochromis sp. KM-2006	NC_009057.1	0.457	16626	Pub
56	Oreochromis sp. 'red tilapia'	NC_014060.1	0.458	16627	Ct
57	Oreochromis variabilis	NC_026109.1	0.461	16626	Pub
58	Parachromis managuensis	NC_026918.1	0.464	16526	Un
59	Paraneetroplus synspilus x Amphilophus citrinellus	NC_024737.1	0.475	16541	Un
60	Paratilapia polleni	NC_011170.1	0.447	16543	Pub
61	Paretroplus maculatus	NC_011177.1	0.468	16486	Pub
62	Petenia splendida	NC_024835.1	0.468	16518	Pub
63	Petrochromis trewavasae	NC_018814.1	0.46	16588	Pub
64	Petrotilapia nigra	NC_018557.1	0.458	16583	Pub
65	Placidochromis longimanus	NC_028156.1	0.46	16581	Ct
66	Protomelas annectens	NC_027953.1	0.46	16583	Un
67	Pseudotropheus crabro	NC_018559.1	0.459	16584	Pub
68	Pterophyllum altum	NC_028723.1	0.458	16495	Un
69	Pterophyllum scalare	NC_026535.1	0.458	16491	Pub
70	Ptychochromoides katria	NC_011169.1	0.453	16556	Pub
71	Pundamilia nyererei	NC_028011	0.453	16761	Pub
72	Pungu maclareni	NC_041674	0.462	16565	Un
73	Retroculus lapidifer	NC_033549.1	0.472	16537	Un
74	Rhamphochromis esox	NC_018563.1	0.46	16583	Pub
75	Rocio octofasciata	NC_033548.1	0.456	16539	Un
76	Sarotherodon galilaeus	MW194078	0.466	16631	Un
77	Sarotherodon galilaeus	15162	0.466	16629	laboratory internal database
78	Sarotherodon galilaeus	21163	0.466	16631	laboratory internal database
79	Sarotherodon galilaeus	24164	0.466	16629	laboratory internal database
80	Sarotherodon galilaeus	26165	0.466	16619	laboratory internal database
81	Sarotherodon linnellii	NC_041673	0.467	16634	Un
82	Sarotherodon lohbergeri	NC_041677	0.466	16634	Un
83	Sarotherodon melanotheron	NC_015611.1	0.466	16627	Pub
84	Serranochromis robustus	NC_031418.1	0.458	16583	Un
85	Stomatepia pindu	NC_041678	0.466	16636	Un
86	Symphysodon aequifasciata	NC_028182.1	0.451	16545	Un
87	Symphysodon discus	NC_026689.1	0.451	16544	Un
88	Symphysodon haraldi	NC_027965.1	0.451	16543	Un
89	Thorichthys aureus	NC_031182.1	0.479	16,53	Pub
90	Trematocranus placodon	NC_018555.1	0.46	16579	Pub
91	Tropheus duboisi	NC_009063.1	0.462	16598	Pub
92	Tropheus moorii	NC_018815.1	0.463	16,59	Pub
93	Tylochromis polylepis	NC_011171.1	0.452	16976	Pub
94	Uaru amphiacanthoides	NC_033550.1	0.455	16549	Un
95	Vieja melanura	NC_023526	0.475	16543	Ct

## Sheet: Mitochondrial tRNAs
Supplementary Table S2. Annotated mitochondrial tRNA genes in cichlids species. Size of each tRNA, the anticodon, and the direction.
tRNA	Size	Minimum	Maximum	Anticodon	Direction
trnF	69	1	70	GAA	forward
trnV	72	1056	1128	UAC	forward
trnLUAA	74	2920	2993	UAA	forward
trnI	70	3973	4044	GAU	forward
trnQ	71	4044	4116	UUG	reverse
trnM	69	4116	4185	CAU	forward
trnW	72	5241	5314	UAC	forward
trnA	69	5318	5386	UGC	reverse
trnN	73	5391	5463	GUU	reverse
trnC	67	5507	5575	GCA	reverse
trnY	70	5576	5652	GUA	reverse
trnSUGA	71	7301	7371	UGA	reverse
trnD	73	7376	7449	GCU	forward
trnK	74	8147	8220	UUU	forward
trnG	72	9857	9929	UCC	forward
trnR	69	10279	10347	UCG	forward
trnH	69	12028	12098	GUG	forward
trnSGCU	67	12099	12169	GCU	forward
trnLUAG	73	12178	12254	UAG	forward
trnE	69	14623	14693	UUC	reverse
trnT	72	15846	15918	UGU	forward
trnP	70	15952	16022	UGG	reverse

## Sheet: Transition & transversion bias
Supplementary Table S3. Transition and transversion bias of cichlid tRNAs
tRNA	length	A	T/U	C	G	CG	AT	K1	K2	R	Retained nt
trnA	69	26.39	35.74	13.12	24.75	37.87	62.13	16.439	16.512	7.396	69
trnC	67	24.18	24.97	22.55	28.3	50.85	49.15	3.353	9.227	3.004	64
trnD	73	31.46	26.63	21.23	20.68	41.91	58.09	7.834	3.23	2.774	73
trnE	69	25.84	36.23	14.55	23.38	37.93	62.07	13.793	10.185	5.482	69
trnF	69	35.12	19.23	21.9	23.76	45.66	54.35	8.609	10.013	4.708	69
trnG	72	32.79	31.06	20.4	15.75	36.15	63.85	2.63	3.771	1.5	72
trnH	71	37.37	28.5	19.72	14.41	34.13	65.87	14.93	27.211	9.345	71
trnI	71	29.61	23.92	22.04	24.43	46.47	53.53	8.716	10.745	4.82	69
trnK	74	30.47	19.54	27.35	22.64	49.99	50.01	4.346	31.826	8.033	74
trnL1	74	27.21	22.03	29.05	21.71	50.76	49.24	6.73	1.217	1.903	74
trnL2	73	31.73	24.67	23.35	20.25	43.6	56.4	21.137	36.745	13.921	73
trnM	69	30.74	29.34	25.26	14.66	39.92	60.08	1.214	5.9	1.985	69
trnN	73	21.23	33.58	17.01	28.17	45.18	54.81	24.853	25.454	11.765	73
trnP	71	27.51	31.88	14.11	26.5	40.61	59.39	5.969	7.762	3.158	70
trnQ	71	23.76	33	15.79	27.46	43.25	56.76	6.376	5.413	2.793	71
trnR	69	30.91	29.25	19.91	19.93	39.84	60.16	31.324	26.368	13.865	69
trnS1	71	23.14	31.66	17.58	27.62	45.2	54.8	77.532	105.956	33.725	71
trnT	72	22.94	21.86	29.15	26.06	55.21	44.8	5.511	10.53	4.003	72
trnV	72	30.05	17.59	29.56	22.8	52.36	47.64	8.674	7.133	3.873	72
trnW	72	28.88	14.9	29.51	26.71	56.22	43.78	19.536	30.509	11.538	72
trnY	70	25.13	26.77	20.17	27.94	48.11	51.9	5.04	10.837	3.769	70

## Sheet: TajimaD test for tRNAs
Supplementary Table S4. Summary statistics for tRNAs genes in cichlids and haplotilapiine lineage.
DnaSP Ver. 6.12.01 22 - January - 2022 11:50:46 PM
===========================================================================
Multi Data File Analysis (DNA Polymorphism/Divergence)
------------------------------------------------------
Input Data: 49 MSA files
Datafile	Region	Ingroup	Outgroup	n	Sites	NetSites	S	Eta	Hap	Hd	VarHd	Pi	VarPi	ThetaK	ThetaWattNuc	ThetaWatt	ZnS	G+Cn	G+Gc	G+Ctot	TajimaD	SigD	FuLiD*	SigD*	FuLiF*	SigF*	AchazY*	FuFs	Ramos-Onsins_Rozas's_R2	K(JC)	FuLiD	SigD	FuLiF	SigF	FayWuN	ZengE	AchazY
Mean		47.5102	1	48.5102	71.1224	69.449	18.1429	23.0816	19.7551	0.767666	0.00584877	0.0536482	n.d.	3.53869	5.24294	5.24294	0.10388	0.449417	n.d.	0.449417	-1.08306	n.d.	-1.29611	n.d.	-1.31892	n.d.	-0.560161	-11.2004	0.0967288	0.158551	-0.894062	n.d.	-1.02385	n.d.	-1.79298	0.781517	-0.956417
Ci trnA	1-69	77	1	78	69	69	25	28	31	0.867396	0.000959684	0.0527653	n.d.	3.64081	5.69741	5.69741	0.0280723	0.378694	n.a.	0.378694	-1.12529	n.s.	-4.07877	**	-3.31995	**	1.66983	-19.6249	0.0670494	0.040208	-4.39692	**	-3.51139	**	0.47348	-1.17579	1.67126
Ci trnC	1-67	77	1	78	67	63	29	43	41	0.933698	0.000318329	0.110585	n.d.	6.96685	8.74959	8.74959	0.0403825	0.531025	n.a.	0.531025	-0.659571	n.s.	-0.784362	n.s.	-0.718327	n.s.	-0.073499	-22.0717	0.122427	0.248755	-0.415257	n.s.	-0.452923	n.s.	-2.73638	2.04118	-0.260105
Ci trnD	1-74	77	1	78	74	71	38	52	48	0.960697	0.00016489	0.106346	n.d.	7.55058	10.5809	10.5809	0.0528191	0.430035	n.a.	0.430035	-0.939055	n.s.	-0.0739993	n.s.	-0.526116	n.s.	-1.27022	-32.215	0.0963811	0.263317	-0.106471	n.s.	-0.569374	n.s.	-2.17195	0.959375	-1.25184
Ci trnE	1-69	77	1	78	69	69	36	39	34	0.824675	0.00197764	0.0381339	n.d.	2.63124	7.93568	7.93568	0.0485358	0.379258	n.a.	0.379258	-2.14776	*	-2.63126	*	-2.73746	**	-1.81206	-32.2595	0.0380726	0.156856	-2.27092	*	-2.48795	**	-2.89283	0.813419	-1.94883
Ci trnF	1-70	77	1	78	70	68	21	23	26	0.889269	0.000446397	0.0414489	n.d.	2.81852	4.68002	4.68002	0.0592523	0.449007	n.a.	0.449007	-1.21281	n.s.	-2.20442	*	-2.11449	#	-0.630062	-16.0767	0.0648756	0.144227	-1.4486	#	-1.5713	#	-2.98088	1.51134	-1.01619
Ci trnG	1-73	77	1	78	73	69	24	34	27	0.821599	0.00147793	0.0411057	n.d.	2.8363	6.91828	6.91828	0.0561802	0.351779	n.a.	0.351779	-1.87409	*	-1.17141	n.s.	-1.71833	#	-2.29522	-17.588	0.0559795	0.0900862	-1.26593	#	-1.8051	*	-1.78336	-0.217205	-2.27353
Ci trnH	1-69	77	1	78	69	69	28	34	38	0.92447	0.000308116	0.073073	n.d.	5.04204	6.91828	6.91828	0.0588637	0.322228	n.a.	0.322228	-0.861407	n.s.	-0.851771	n.s.	-0.729343	n.s.	0.0643423	-24.6081	0.0864177	0.128626	-0.939621	n.s.	-0.785481	n.s.	-1.03782	0.662108	0.074211
Ci trnI	1-71	77	1	78	71	69	29	34	33	0.921394	0.000323021	0.0820381	n.d.	5.66063	6.91828	6.91828	0.0867072	0.464897	n.a.	0.464897	-0.577404	n.s.	-2.57673	#	-2.08629	#	0.73675	-14.4175	0.0940591	0.132434	-2.40396	n.s.	-1.94129	n.s.	-0.901682	0.30393	0.466524
Ci trnK	1-74	77	1	78	74	71	22	30	26	0.852016	0.00112239	0.0545955	n.d.	3.87628	6.10437	6.10437	0.0885812	0.497165	n.a.	0.497165	-1.14582	n.s.	-2.51418	*	-2.18702	#	0.310999	-11.2239	0.0843206	0.0715329	-2.67778	#	-2.29627	#	-0.470339	-0.299487	0.318525
Ci trnL1	1-74	77	1	78	74	73	26	36	30	0.797676	0.0019161	0.0540408	n.d.	3.94498	7.32524	7.32524	0.0592403	0.511831	n.a.	0.511831	-1.473	n.s.	-1.77074	#	-1.9701	#	-1.47539	-16.5382	0.0711373	0.163775	-0.986364	n.s.	-1.4173	n.s.	-2.24324	0.54369	-1.71975
Ci trnL2	1-73	77	1	78	73	72	9	11	17	0.615174	0.00392257	0.0155218	n.d.	1.11757	2.23827	2.23827	0.044	0.441919	n.a.	0.441919	-1.35768	n.s.	-0.467893	n.s.	-0.844742	n.s.	-1.41312	-13.9716	0.0614768	0.0834829	0.367805	n.s.	-0.222765	n.s.	-5.23718	3.18997	-1.64522
Ci trnM	1-70	77	1	78	70	67	13	15	18	0.823992	0.00108363	0.0299171	n.d.	2.00444	3.05218	3.05218	0.0561537	0.381275	n.a.	0.381275	-0.984951	n.s.	-0.462193	n.s.	-0.714587	n.s.	-0.951123	-8.95876	0.0750648	0.11116	-0.502519	n.s.	-0.750923	n.s.	-2.56586	1.36502	-0.93747
Ci trnN	1-73	77	1	78	73	72	23	26	27	0.768968	0.00241782	0.0500778	n.d.	3.6056	5.29045	5.29045	0.0746358	0.444444	n.a.	0.444444	-0.984935	n.s.	-1.62018	n.s.	-1.4262	n.s.	0.0333307	-13.6423	0.0745203	0.129632	-1.30788	n.s.	-1.196	n.s.	-2.33277	1.48824	-0.186989
Ci trnP	1-71	77	1	78	71	66	31	34	43	0.956938	0.000148313	0.0816867	n.d.	5.39132	6.91828	6.91828	0.0454852	0.41283	n.a.	0.41283	-0.701048	n.s.	-0.0739993	n.s.	-0.277957	n.s.	-0.587236	-32.0547	0.0841198	0.342398	0.949129	n.s.	0.425606	n.s.	-4.8336	3.77645	-0.891796
Ci trnQ	1-71	77	1	78	71	71	19	22	23	0.836295	0.000825511	0.0323761	n.d.	2.2987	4.47654	4.47654	0.0764896	0.432413	n.a.	0.432413	-1.4753	n.s.	-2.79285	**	-2.56958	**	-0.330576	-14.4854	0.0610304	0.0812543	-2.97965	**	-2.69771	**	-0.475976	-0.660952	-0.32017
Ci trnR	1-69	77	1	78	69	69	29	32	34	0.92242	0.000315239	0.0674562	n.d.	4.65448	6.51133	6.51133	0.0599015	0.398457	n.a.	0.398457	-0.900787	n.s.	-1.94015	n.s.	-1.71693	n.s.	-0.0656011	-19.6256	0.0759482	0.159645	-1.37707	n.s.	-1.31031	n.s.	-1.77117	0.882729	-0.409112
Ci trnS1	1-71	77	1	78	71	71	23	24	28	0.737184	0.00297315	0.0447325	n.d.	3.17601	4.88349	4.88349	0.0637386	0.451985	n.a.	0.451985	-1.07154	n.s.	-0.960612	n.s.	-1.08898	n.s.	-0.770268	-17.2486	0.0666172	0.10255	-1.05435	n.s.	-1.15976	n.s.	-2.45255	1.3212	-0.755751
Ci trnS2	1-67	59	1	60	67	65	34	40	28	0.800701	0.00286146	0.114418	n.d.	7.43717	8.60908	8.60908	0.0848387	0.437027	n.a.	0.437027	-0.453069	n.s.	-0.405809	n.s.	-0.535742	n.s.	-0.542756	-7.64659	0.106247	0.147655	-0.170198	n.s.	-0.378083	n.s.	0.230697	-0.717265	-0.64216
Ci trnT	1-72	77	1	78	72	71	33	45	38	0.878674	0.00101776	0.0681553	n.d.	4.83903	9.15655	9.15655	0.0445664	0.54893	n.a.	0.54893	-1.53136	n.s.	-1.74015	#	-1.88557	#	-1.26425	-25.5873	0.0678318	0.173545	-1.88999	n.s.	-1.99615	#	-0.106998	-1.16836	-1.24738
Ci trnV	1-72	77	1	78	72	72	29	36	41	0.950786	0.000161546	0.0724159	n.d.	5.21394	7.32524	7.32524	0.0478959	0.523629	n.a.	0.523629	-0.92003	n.s.	0.279697	n.s.	-0.302049	n.s.	-1.47065	-29.2867	0.0869329	0.139995	0.680426	n.s.	-0.0437355	n.s.	-1.41686	0.224618	-1.54205
Ci trnW	1-72	77	1	78	72	70	30	34	31	0.882775	0.000674827	0.0457475	n.d.	3.20232	6.91828	6.91828	0.0531596	0.551948	n.a.	0.551948	-1.70604	#	-1.94015	#	-2.11781	#	-1.52509	-22.1803	0.0507624	0.0789688	-1.74829	n.s.	-1.98874	#	-0.998137	-0.584962	-1.61344
Ci trnY	1-70	77	1	78	70	67	28	35	41	0.954204	0.000159006	0.0911488	n.d.	6.10697	7.12176	7.12176	0.0548063	0.483233	n.a.	0.483233	-0.453746	n.s.	-1.60608	n.s.	-1.44537	n.s.	-0.109653	-25.2472	0.10533	0.120662	-1.74965	n.s.	-1.53855	n.s.	-0.717003	0.0381464	-0.0989791
Ht trnA	1-69	18	1	19	69	69	5	5	7	0.568627	0.0189825	0.0108932	n.d.	0.751634	1.45368	1.45368	0.0245904	0.387279	n.a.	0.387279	-1.52864	n.s.	-1.13794	n.s.	-1.31164	n.s.	-1.71095	-4.95144	0.0854711	0.00565735	-1.32516	n.s.	-1.47057	n.s.	0.578772	-1.56916	-1.56727
Ht trnC	1-67	18	1	19	67	63	13	13	10	0.875817	0.0039389	0.0517689	n.d.	3.26144	3.77956	3.77956	0.108215	0.549383	n.a.	0.549383	-0.511331	n.s.	-1.10857	n.s.	-0.993316	n.s.	0.570999	-2.84708	0.109986	0.238895	-0.53217	n.s.	-0.562956	n.s.	-2.18512	1.69064	-0.337418
Ht trnD	1-74	18	1	19	74	73	13	14	11	0.816993	0.0089619	0.0535411	n.d.	3.9085	4.0703	4.0703	0.171193	0.414764	n.a.	0.414764	-0.149577	n.s.	-0.911361	n.s.	-0.729701	n.s.	1.04482	-3.22556	0.136144	0.246441	-0.700307	n.s.	-0.563625	n.s.	-0.705898	0.570538	0.472343
Ht trnE	1-69	18	1	19	69	69	5	5	6	0.679739	0.0119183	0.014398	n.d.	0.993464	1.45368	1.45368	0.0581809	0.377617	n.a.	0.377617	-1.00207	n.s.	-1.13794	n.s.	-1.15926	n.s.	-0.429746	-2.46932	0.0995655	0.152115	-0.468186	n.s.	-0.658338	n.s.	-0.912678	0.114059	-1.191
Ht trnF	1-69	18	1	19	69	69	3	3	3	0.45098	0.0137914	0.00937766	n.d.	0.647059	0.872206	0.872206	0.435294	0.451691	n.a.	0.451691	-0.715727	n.s.	-1.19315	n.s.	-1.11831	n.s.	0.464312	0.20069	0.168324	0.148181	-0.150836	n.s.	-0.321798	n.s.	-1.70273	0.988835	-0.973303
Ht trnG	1-73	18	1	19	73	71	7	7	7	0.738562	0.00978674	0.0173065	n.d.	1.22876	2.03515	2.03515	0.0986567	0.350548	n.a.	0.350548	-1.34458	n.s.	-1.11981	n.s.	-1.24741	n.s.	-1.27518	-3.03688	0.0945168	0.092309	0.707993	n.s.	0.118315	n.s.	-4.15808	2.80456	-2.22255
Ht trnH	1-69	18	1	19	69	69	4	4	4	0.313725	0.0189354	0.00786208	n.d.	0.542484	1.16294	1.16294	0.248702	0.318035	n.a.	0.318035	-1.60021	#	-1.6133	n.s.	-1.69362	n.s.	-1.38293	-1.48575	0.127705	0.11367	-1.81612	n.s.	-1.86466	n.s.	0.494261	-1.50351	-1.27204
Ht trnI	1-70	18	1	19	70	70	6	6	7	0.738562	0.00978674	0.0252101	n.d.	1.76471	1.74441	1.74441	0.15537	0.479365	n.a.	0.479365	0.038302	n.s.	-0.785894	n.s.	-0.58818	n.s.	1.24383	-1.82236	0.134484	0.103672	-0.194143	n.s.	-0.135742	n.s.	-1.05362	0.972787	0.249331
Ht trnK	1-74	18	1	19	74	74	4	4	5	0.732026	0.00535547	0.0127186	n.d.	0.941176	1.16294	1.16294	0.0248603	0.506006	n.a.	0.506006	-0.571951	n.s.	-0.701136	n.s.	-0.700642	n.s.	-0.118101	-1.41208	0.119371	0.0925722	0.161085	n.s.	-0.0446329	n.s.	-1.17062	0.634182	-0.973327
Ht trnL1	1-74	18	1	19	74	74	8	8	8	0.797386	0.00546306	0.0199611	n.d.	1.47712	2.32588	2.32588	0.0740163	0.506006	n.a.	0.506006	-1.26827	n.s.	-1.38921	n.s.	-1.43091	n.s.	-0.740843	-3.64979	0.0803255	0.161003	-0.420067	n.s.	-0.714839	n.s.	-1.61865	0.550182	-1.64941
Ht trnL2	1-73	18	1	19	73	73	3	3	4	0.398693	0.0190034	0.00707315	n.d.	0.51634	0.872206	0.872206	0.103114	0.434551	n.a.	0.434551	-1.13127	n.s.	-1.19315	n.s.	-1.23603	n.s.	-0.65523	-1.59634	0.115658	0.0844944	-0.150836	n.s.	-0.440982	n.s.	-3.437	2.19879	-1.63326
Ht trnM	1-70	18	1	19	70	67	7	7	5	0.666667	0.010705	0.0192176	n.d.	1.28758	2.03515	2.03515	0.343282	0.381426	n.a.	0.381426	-1.24649	n.s.	-1.72671	n.s.	-1.68081	n.s.	-0.0488466	-0.61757	0.142946	0.097252	-0.659913	n.s.	-0.88567	n.s.	-2.59227	1.45219	-1.47571
Ht trnN	1-73	18	1	19	73	72	4	4	5	0.666667	0.00683181	0.0132534	n.d.	0.954248	1.16294	1.16294	0.126373	0.436728	n.a.	0.436728	-0.538237	n.s.	-0.701136	n.s.	-0.690978	n.s.	-0.0488466	-1.37663	0.120606	0.125712	0.161085	n.s.	-0.0347144	n.s.	-3.0176	2.2629	-0.924956
Ht trnP	1-71	18	1	19	71	70	9	10	9	0.823529	0.00564835	0.037535	n.d.	2.62745	2.90735	2.90735	0.175048	0.389682	n.a.	0.389682	-0.346694	n.s.	0.800849	n.s.	0.647009	n.s.	-0.564185	-2.59016	0.139033	0.335708	0.826208	n.s.	0.662683	n.s.	-0.565743	0.615215	-0.45418
Ht trnQ	1-71	18	1	19	71	71	4	4	4	0.398693	0.0190034	0.00883734	n.d.	0.627451	1.16294	1.16294	0.26782	0.448357	n.a.	0.448357	-1.38107	n.s.	-1.6133	n.s.	-1.6308	n.s.	-0.65523	-1.16213	0.130294	0.0619581	-0.827518	n.s.	-1.04143	n.s.	-1.3267	0.227001	-1.63326
Ht trnR	1-69	18	1	19	69	69	3	3	4	0.542484	0.0151572	0.00994601	n.d.	0.686275	0.872206	0.872206	0.0829832	0.409823	n.a.	0.409823	-0.591064	n.s.	-0.0847767	n.s.	-0.232491	n.s.	-0.8799	-0.96383	0.122553	0.141345	1.02948	n.s.	0.625717	n.s.	-5.01361	3.89273	-1.50541
Ht trnS1	1-72	18	1	19	72	71	5	5	5	0.54902	0.0161919	0.0143607	n.d.	1.01961	1.45368	1.45368	0.22464	0.458529	n.a.	0.458529	-0.945147	n.s.	-0.358963	n.s.	-0.547716	n.s.	-1.22429	-1.20721	0.101532	0.103903	0.388792	n.s.	0.0128248	n.s.	-3.47263	2.41741	-1.60987
Ht trnS2	1-67	18	1	19	67	67	12	12	9	0.862745	0.00371177	0.0358014	n.d.	2.39869	3.48883	3.48883	0.109216	0.486733	n.a.	0.486733	-1.15387	n.s.	-1.7018	n.s.	-1.63561	n.s.	0.0844078	-2.94424	0.0893699	0.298523	-0.700307	n.s.	-0.897291	n.s.	-2.06077	1.0586	-1.28568
Ht trnT	1-72	18	1	19	72	72	10	10	9	0.862745	0.00371177	0.0223312	n.d.	1.60784	2.90735	2.90735	0.0822039	0.550926	n.a.	0.550926	-1.6096	#	-2.25762	#	-2.19289	#	-0.118101	-4.68706	0.0842301	0.158346	-0.579936	n.s.	-0.950161	n.s.	-3.83925	2.37004	-2.12739
Ht trnV	1-72	18	1	19	72	72	12	12	7	0.568627	0.0189825	0.0266885	n.d.	1.92157	3.48883	3.48883	0.346478	0.509259	n.a.	0.509259	-1.6589	#	-0.911361	n.s.	-1.18784	n.s.	-2.12835	-1.5565	0.094376	0.146058	-1.16373	n.s.	-1.40681	n.s.	-0.683127	-0.649607	-1.93706
Ht trnW	1-72	18	1	19	72	71	6	6	6	0.562092	0.017997	0.0121513	n.d.	0.862745	1.74441	1.74441	0.068112	0.561815	n.a.	0.561815	-1.66411	#	-1.46752	n.s.	-1.60445	n.s.	-1.71095	-2.91598	0.0775642	0.0585663	-0.95374	n.s.	-1.23299	n.s.	-3.27794	1.76079	-2.08587
Ht trnY	1-70	18	1	19	70	67	10	12	9	0.797386	0.00804516	0.0358014	n.d.	2.39869	3.48883	3.48883	0.0936448	0.497512	n.a.	0.497512	-1.15387	n.s.	-0.114516	n.s.	-0.31359	n.s.	-1.10891	-2.94424	0.114163	0.0981966	0.20307	n.s.	-0.211691	n.s.	-4.00735	2.82636	-1.78752
-----
ThetaWattNuc, ThetaWatt and TajimaD are calculated using the total number of mutations

## Sheet: TajimaD test for CDS
Supplementary Table S5. Summary statistics for protein-coding genes in cichlids and haplotilapiine lineage.
DnaSP Ver. 6.12.01 03 - August - 2021 1:00:36 AM
=========================================================================
Multi Data File Analysis (DNA Polymorphism/Divergence)
------------------------------------------------------
Input Data: 26 MSA files
Datafile	Region	Ingroup	Outgroup	n	Sites	NetSites	S	Eta	Hap	Hd	VarHd	Pi	VarPi	ThetaK	ThetaWattNuc	ThetaWatt	ZnS	G+Cn	G+Gc	G+Ctot	TajimaD	SigD	FuLiD*	SigD*	FuLiF*	SigF*	AchazY*	FuFs	Ramos-Onsins_Rozas's_R2	K(JC)	FuLiD	SigD	FuLiF	SigF	FayWuN	ZengE	AchazY
Mean		46.8077	1	47.8077	883.385	852.846	313.808	465.615	38.9615	0.963385	0.000720237	0.105407	n.d.	89.8257	105.427	105.427	0.114633	0.457122	n.d.	0.457122	-0.590761	n.d.	-0.249494	n.d.	-0.251186	n.d.	-0.117838	-3.03573	0.131473	0.278183	0.406872	n.d.	0.199343	n.d.	-2.67626	2.52687	-0.500637
Ci ATP6	1-685	77	1	78	685	674	326	569	66	0.994874	1.14814e-05	0.15043	n.d.	101.39	115.78	115.78	0.0403456	0.466184	n.a.	0.466184	-0.432613	n.s.	0.238696	n.s.	0.170969	n.s.	-0.0624117	-4.46269	0.150912	0.28308	0.557444	n.s.	0.367202	n.s.	-1.2776	1.20732	-0.147073
Ci ATP8	1-168	77	1	78	168	164	83	124	49	0.974026	6.47875e-05	0.121862	n.d.	19.9853	25.2314	25.2314	0.0517321	0.442667	n.a.	0.442667	-0.707695	n.s.	-0.809349	n.s.	-0.59555	n.s.	0.272898	-10.8422	0.116182	0.290212	-0.466206	n.s.	-0.348607	n.s.	-2.10961	1.82992	0.0908711
Ci Cox1	1-1604	77	1	78	1604	1535	627	1078	74	0.998633	6.30813e-06	0.129675	n.d.	199.051	219.35	219.35	0.0525332	0.461965	n.a.	0.461965	-0.323098	n.s.	0.979987	n.s.	0.897535	n.s.	0.212866	-6.67451	0.155076	0.225714	1.22304	n.s.	1.0326	n.s.	-1.98581	2.33603	0.185869
Ci COX2	1-666	77	1	78	666	660	288	443	69	0.996582	8.50985e-06	0.119697	n.d.	79.0003	90.1412	90.1412	0.0486546	0.445848	n.a.	0.445848	-0.429428	n.s.	-0.128126	n.s.	-0.00397037	n.s.	0.253649	-10.7494	0.133272	0.269603	0.276056	n.s.	0.264384	n.s.	-3.13615	3.07607	0.108425
Ci COX3	1-783	77	1	78	783	772	337	543	67	0.992823	2.30142e-05	0.129253	n.d.	99.7833	110.489	110.489	0.0560842	0.471822	n.a.	0.471822	-0.337169	n.s.	0.483674	n.s.	0.526936	n.s.	0.301229	-5.48364	0.143925	0.198538	0.655607	n.s.	0.634603	n.s.	-1.03149	1.3553	0.266279
Ci CYTB	1-1137	77	1	78	1137	1136	528	869	74	0.998633	6.30813e-06	0.143189	n.d.	162.663	176.823	176.823	0.0477781	0.474678	n.a.	0.474678	-0.279372	n.s.	0.635099	n.s.	0.621628	n.s.	0.232453	-8.68686	0.150221	0.267862	1.16902	n.s.	0.949934	n.s.	-2.01943	2.27459	0.0994797
Ci ND1	1-975	77	1	78	975	975	493	859	72	0.997949	6.86443e-06	0.150011	n.d.	146.26	174.788	174.788	0.0415553	0.475964	n.a.	0.475964	-0.569351	n.s.	-0.143793	n.s.	-0.105891	n.s.	0.0297993	-6.91219	0.143817	0.302567	0.0695541	n.s.	0.033445	n.s.	-2.18163	2.01955	-0.0452448
Ci ND2	1-1056	77	1	78	1056	1042	597	1046	73	0.997949	7.53817e-06	0.162034	n.d.	168.84	212.839	212.839	0.0416173	0.477167	n.a.	0.477167	-0.721682	n.s.	-0.818164	n.s.	-0.795651	n.s.	-0.334799	-6.79829	0.136458	0.332553	-0.496968	n.s.	-0.582352	n.s.	-2.06025	1.44263	-0.466013
Ci ND3	1-351	77	1	78	351	350	182	314	64	0.992823	1.69505e-05	0.16242	n.d.	56.8469	63.8924	63.8924	0.0545894	0.456994	n.a.	0.456994	-0.381861	n.s.	0.477174	n.s.	0.564627	n.s.	0.396253	-9.58736	0.151453	0.328969	0.913643	n.s.	0.851962	n.s.	-2.49132	2.75366	0.263118
Ci ND4	1-1395	77	1	78	1395	1376	727	1241	74	0.998633	6.30813e-06	0.153904	n.d.	211.772	252.517	252.517	0.0432142	0.467174	n.a.	0.467174	-0.563613	n.s.	-0.146772	n.s.	-0.0911578	n.s.	0.0707341	-6.13434	0.141387	0.294477	0.35803	n.s.	0.231776	n.s.	-1.93016	1.82301	-0.0926181
Ci ND4L	1-297	77	1	78	297	287	139	232	57	0.982228	5.45295e-05	0.144848	n.d.	41.5714	47.2071	47.2071	0.0520897	0.505588	n.a.	0.505588	-0.411748	n.s.	0.372316	n.s.	0.282127	n.s.	-0.0773141	-7.14036	0.145145	0.307381	0.728251	n.s.	0.509368	n.s.	-3.05075	2.82759	-0.175186
Ci ND5	1-1845	77	1	78	1845	1816	961	1601	74	0.998633	6.30813e-06	0.153415	n.d.	278.602	325.77	325.77	0.04643	0.44728	n.a.	0.44728	-0.506071	n.s.	-0.126201	n.s.	-0.0363201	n.s.	0.162904	-4.12199	0.140224	0.331041	0.511799	n.s.	0.371171	n.s.	-2.45068	2.39566	-0.042179
Ci ND6	1-522	59	1	60	522	4	2	4	5	0.568673	0.00271505	0.170807	n.d.	0.683226	0.860908	0.860908	n.a.	0.11017	n.a.	0.11017	-0.452106	n.s.	n.a.	n.s.	n.a.	n.s.	n.a.	-1.0059	0.200833	0.124136	n.a.	n.s.	n.a.	n.s.	n.a.	n.a.	n.a.
Ht ATP6	1-685	18	1	19	685	674	183	199	16	0.980392	0.000806907	0.0762495	n.d.	51.3922	57.8564	57.8564	0.181407	0.455984	n.a.	0.455984	-0.474024	n.s.	-0.180889	n.s.	-0.248006	n.s.	-0.381622	0.19845	0.123672	0.286865	0.53051	n.s.	0.244966	n.s.	-2.95545	2.88646	-0.786005
Ht ATP8	1-168	18	1	19	168	165	33	34	9	0.836601	0.00564237	0.043573	n.d.	7.18954	9.88501	9.88501	0.185962	0.453199	n.a.	0.453199	-1.10324	n.s.	-1.02894	n.s.	-1.09779	n.s.	-0.746835	0.72664	0.0967223	0.280485	0.063297	n.s.	-0.320329	n.s.	-3.36368	2.53067	-1.5107
Ht COX1	1-1604	18	1	19	1604	1592	359	405	16	0.980392	0.000806907	0.0602235	n.d.	95.8758	117.748	117.748	0.17846	0.47142	n.a.	0.47142	-0.792233	n.s.	-0.589132	n.s.	-0.630915	n.s.	-0.386696	1.62895	0.115018	0.222069	0.406835	n.s.	0.0650439	n.s.	-3.54543	3.32344	-1.03861
Ht COX2	1-666	18	1	19	666	666	124	133	15	0.973856	0.000856965	0.0527783	n.d.	35.1503	38.6678	38.6678	0.1873	0.457458	n.a.	0.457458	-0.383989	n.s.	-0.243064	n.s.	-0.256313	n.s.	-0.124002	0.29758	0.127857	0.255413	0.571982	n.s.	0.320744	n.s.	-3.0712	3.10685	-0.655571
Ht COX3	1-783	18	1	19	783	774	155	173	15	0.973856	0.000856965	0.0485214	n.d.	37.5556	50.2972	50.2972	0.172291	0.47373	n.a.	0.47373	-1.07313	n.s.	-1.18402	n.s.	-1.14716	n.s.	-0.107224	0.47065	0.104234	0.185722	-0.37251	n.s.	-0.567746	n.s.	-3.03709	2.51432	-0.968582
Ht CYTB	1-1137	18	1	19	1137	1136	316	358	16	0.980392	0.000806907	0.0784486	n.d.	89.1176	104.083	104.083	0.150687	0.475548	n.a.	0.475548	-0.612831	n.s.	-0.293086	n.s.	-0.347638	n.s.	-0.353136	1.46084	0.121717	0.261952	0.631552	n.s.	0.29667	n.s.	-2.94992	2.85322	-0.892667
Ht ND1	1-975	18	1	19	975	975	263	292	16	0.980392	0.000806907	0.0709167	n.d.	69.1438	84.8948	84.8948	0.174066	0.475612	n.a.	0.475612	-0.789747	n.s.	-0.645609	n.s.	-0.685949	n.s.	-0.399318	0.88138	0.11358	0.295981	0.245039	n.s.	-0.0636269	n.s.	-3.38411	3.09544	-1.01876
Ht ND2	1-1056	18	1	19	1056	1046	262	296	16	0.980392	0.000806907	0.0670966	n.d.	70.183	86.0577	86.0577	0.190916	0.47849	n.a.	0.47849	-0.785269	n.s.	-0.197429	n.s.	-0.330162	n.s.	-0.720368	0.9154	0.116498	0.328224	1.02406	n.s.	0.51176	n.s.	-3.82705	3.64321	-1.26634
Ht ND3	1-351	18	1	19	351	351	94	106	15	0.973856	0.000856965	0.0751541	n.d.	26.3791	30.818	30.818	0.170401	0.487179	n.a.	0.487179	-0.60566	n.s.	-0.413138	n.s.	-0.440168	n.s.	-0.244878	-0.47169	0.122068	0.323215	0.557749	n.s.	0.247243	n.s.	-3.40383	3.26597	-0.880761
Ht ND4	1-1395	18	1	19	1395	1385	389	423	16	0.980392	0.000806907	0.0741181	n.d.	102.654	122.981	122.981	0.174122	0.469675	n.a.	0.469675	-0.705109	n.s.	-0.55795	n.s.	-0.60209	n.s.	-0.388574	1.7869	0.11336	0.285235	0.349218	n.s.	0.0304618	n.s.	-2.94107	2.67633	-0.989063
Ht ND5	1-1845	18	1	19	1845	1821	496	546	16	0.980392	0.000806907	0.0720857	n.d.	131.268	158.742	158.742	0.174389	0.45201	n.a.	0.45201	-0.739118	n.s.	-0.525956	n.s.	-0.57771	n.s.	-0.419277	2.36455	0.114036	0.326794	0.363875	n.s.	0.0408971	n.s.	-3.29785	3.07728	-0.993331
Ht ND6	1-522	18	1	19	522	511	136	154	16	0.980392	0.000806907	0.0707059	n.d.	36.1307	44.7733	44.7733	0.166763	0.49826	n.a.	0.49826	-0.816509	n.s.	-0.881254	n.s.	-0.887288	n.s.	-0.279633	-0.65897	0.11494	0.338213	-0.212386	n.s.	-0.415113	n.s.	-2.42125	1.93824	-0.900721
ND4L	1-297	18	1	19	297	287	59	64	13	0.954248	0.00112369	0.0591651	n.d.	16.9804	18.6071	18.6071	0.182429	0.533101	n.a.	0.533101	-0.363123	n.s.	-0.511426	n.s.	-0.463736	n.s.	0.147354	0.0701	0.125699	0.286451	0.51331	n.s.	0.277115	n.s.	-2.98357	2.9191	-0.660548
-----
ThetaWattNuc, ThetaWatt and TajimaD are calculated using the total number of mutations

## Sheet: Amino acid change
Supplementary Table S6. Amino acid change in cichlids and haplotilapiine lineage
Cichlids																							Haplotilapiine
Row Labels	A	D	E	F	G	H	I	K	L	M	N	P	Q	S	T	V	W	Y	Grand Total				Row Labels	A	D	E	F	H	I	L	M	N	P	Q	R	S	T	V	Grand Total
A					1					4				9	13	6			33				A														11	2	13
C					2														2				F							4									4
D											1			1					2				G	1		1										1			3
F									9					1				1	11				H							2					2				4
G	2	1	1											2		1			7				I														2	13	15
H									2		1		2		1			1	7				L				2				2						1		5
I									7	7				1	8	18			41				M							1								2	3
K			1								1			1					3				N		1											2			3
L				5		1	5			4		2		2	1	1			21				P							1						1			2
M									7						2	1			10				Q					1											1
N						1								3	1			1	6				R											1					1
P				1					1					5					7				S	1			2					2	2				1		8
Q								1	1										2				T	9					2							1			12
R						1							1				1		3				V	2					10		1						1		14
S	5			2	1					1	5	5			6				25				Y					1											1
T	9						5		1	5	2	2		7		1			32				Grand Total	13	1	1	4	2	12	8	3	2	2	1	2	5	16	17	89
V	5						19		2	4					1				31
Y				1		1			2										4
Grand Total	21	1	2	9	4	4	29	1	32	25	10	9	3	32	33	28	1	3	247
